# Supplementary material for: Multicolor luminescence and triple-mode emission of simple CaTiO3:Pr3+,Er3+particles for advanced anti-counterfeiting
Source: Royal Society of Chemistry journal article supplement (doi:10.1039/d0qi00462f), 2020-01-01
Supplement: d0qi00462f1.pdf [file d0qi00462f1.pdf]

## Supporting Information

### Multiple Anti-counterfeiting Guarantees from Simple $\text{CaTiO}_3:\text{Pr}^{3+}$ , $\text{Er}^{3+}$ Particles— Multicolor Luminescence and a Multistate Luminescence Mode

Zhenbin Wang<sup>1</sup>, Pengxiang Pei<sup>1</sup>, Dongjie Bai<sup>1</sup>, Shanshan Zhao<sup>1</sup>, Xinyu Ma<sup>1</sup>, Weisheng Liu\*<sup>1</sup>

<sup>1</sup>, Key Laboratory of Nonferrous Metal Chemistry and Resources Utilization of Gansu Province and State Key Laboratory of Applied Organic Chemistry, College of Chemistry and Chemical Engineering, Lanzhou University, Lanzhou, 730000, China

Corresponding author: liuws@lzu.edu.cn

Tel.: +86 / (0) 931-8915151

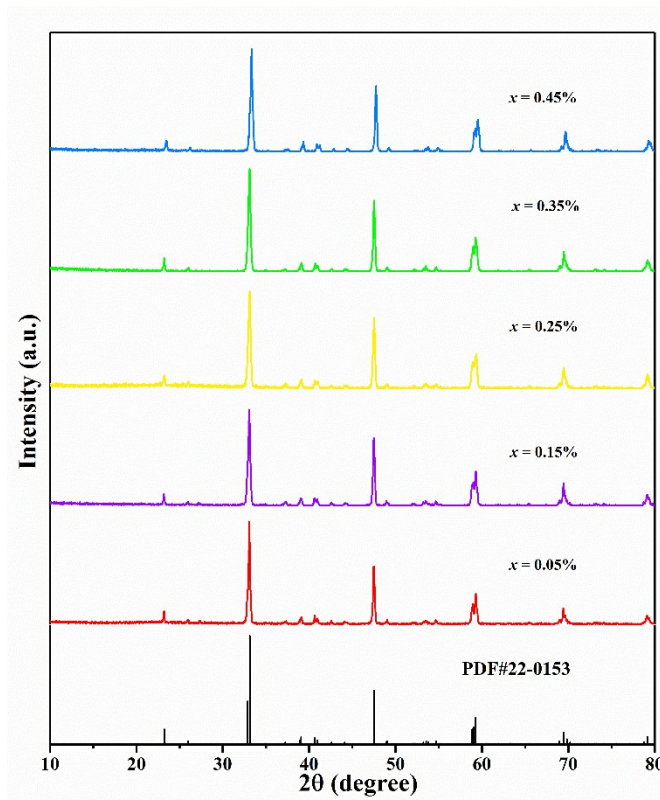

Fig. S1. XRD patterns of synthesized  $\text{CaTiO}_3:x\text{Pr}^{3+}$  ( $0.0005 \leq x \leq 0.0045$ ) samples.

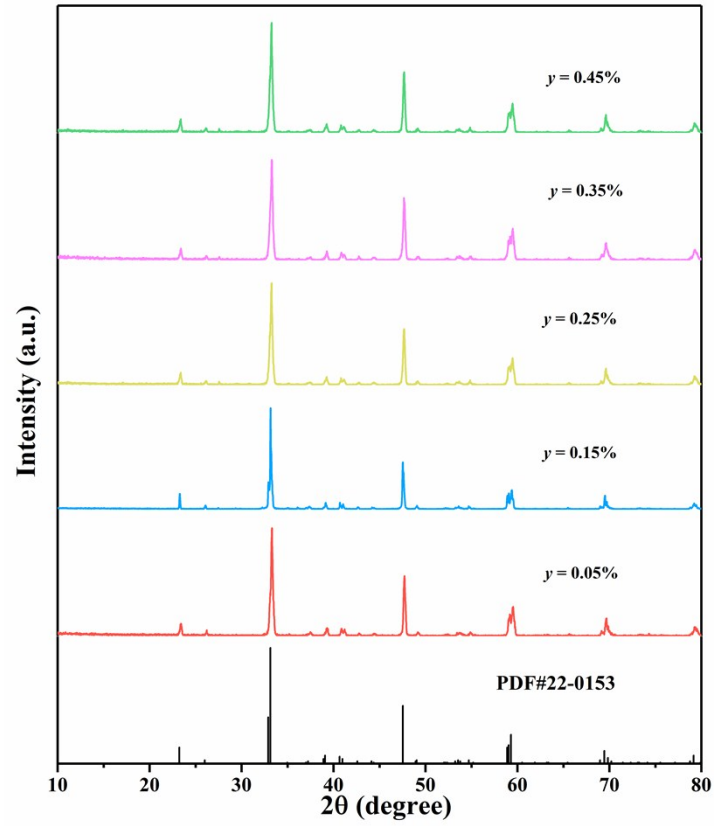

Fig. S2. XRD patterns of synthesized  $\text{CaTiO}_3:0.0025\text{Pr}^{3+}, y\text{Er}^{3+}$  ( $0.0005 \leq y \leq 0.0045$ ) samples.

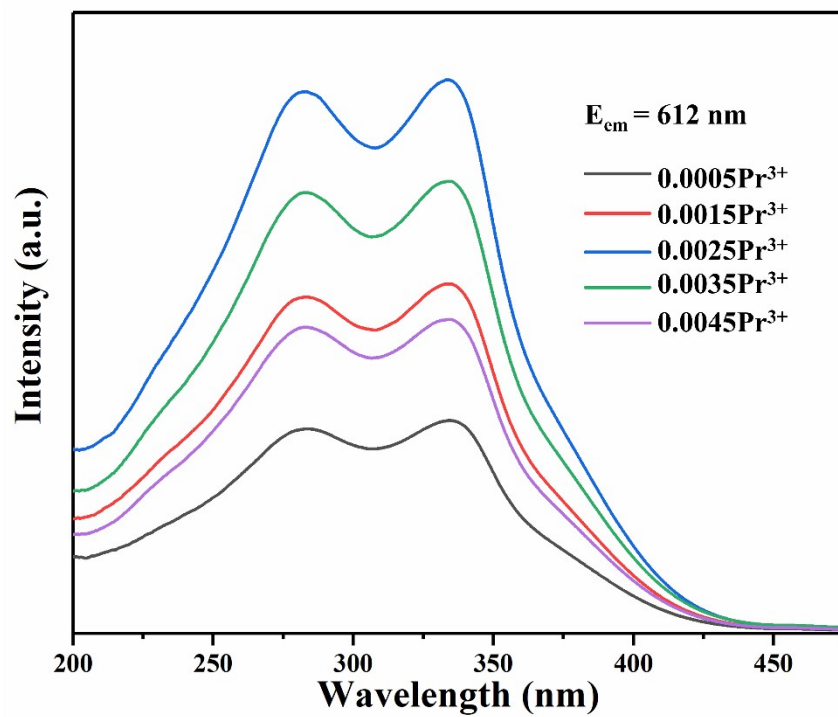

Fig. S3. Excitation spectra of  $\text{Ca}_{1-x}\text{TiO}_3:x\text{Pr}^{3+}$  ( $0.0005 \leq x \leq 0.0045$ ).

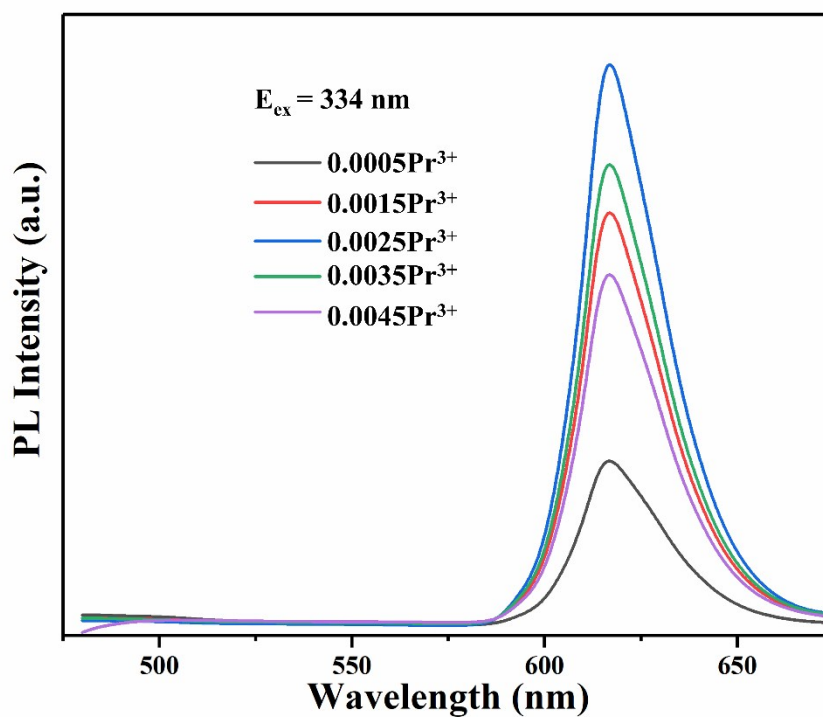

Fig. S4. Emission spectra of  $\text{Ca}_{1-x}\text{TiO}_3:x\text{Pr}^{3+}$  ( $0.0005 \leq x \leq 0.0045$ ) showing variation of

emission intensity as a function of  $\text{Pr}^{3+}$  concentrations,  $\lambda_{\text{ex}}=334\text{nm}$ . The optimal dopant concentration is found to be 0.25mol%, beyond which concentration quenching occurs and the emission intensity decreases dramatically<sup>[2]</sup>.

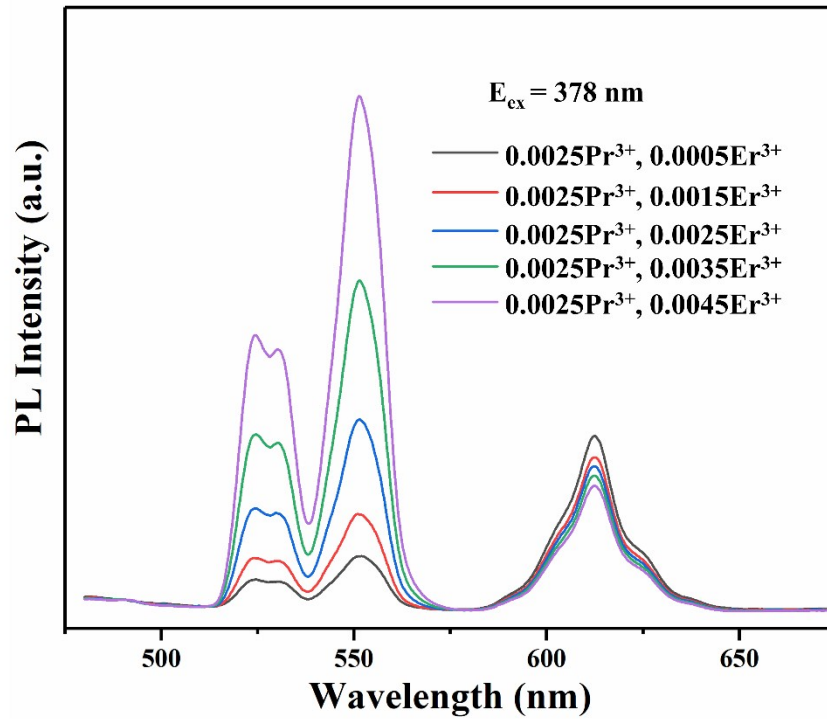

Fig. S5. Emission spectra of  $\text{Pr}^{3+}$  and  $\text{Er}^{3+}$  ( $\lambda_{\text{ex}} = 378 \text{ nm}$ ), showing an improved emission of  $\text{Er}^{3+}$  as increasing  $\text{Er}^{3+}$  concentration. Thus, the compromised concentration of  $y = 0.0025$  was selected to produce a dual-emission from  $\text{Pr}^{3+}$  and  $\text{Er}^{3+}$ .

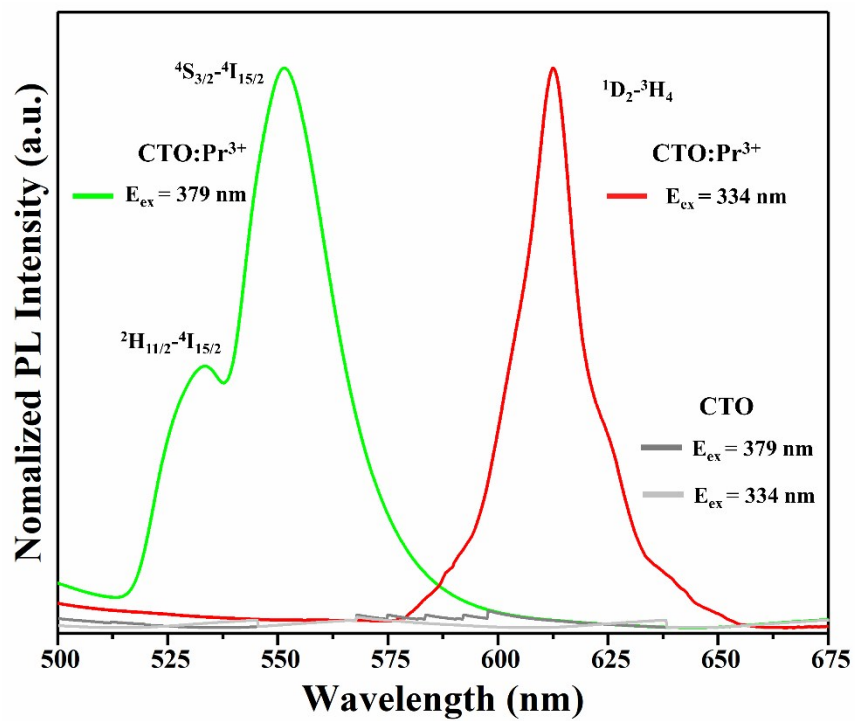

Fig. S6. PL spectra of CTO: R<sup>3+</sup> (R<sup>3+</sup> = Pr<sup>3+</sup>, Er<sup>3+</sup>) and CTO samples.

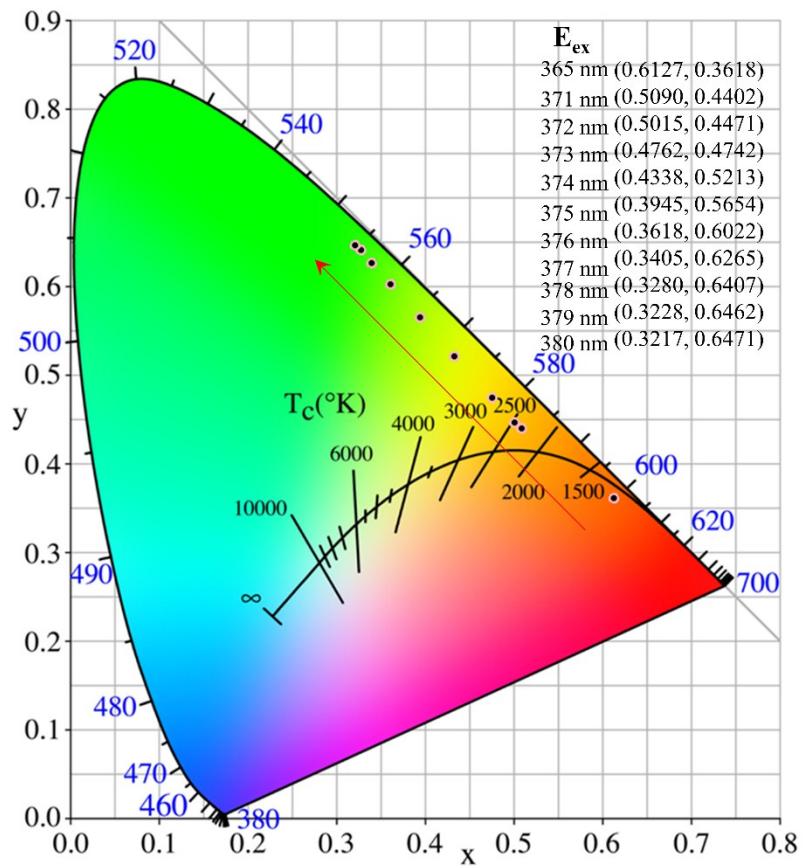

Fig. S7. CIE chromaticity diagram of the  $\text{CaTiO}_3:\text{Pr}^{3+}$ ,  $\text{Er}^{3+}$  sample under different wavelengths irradiation.

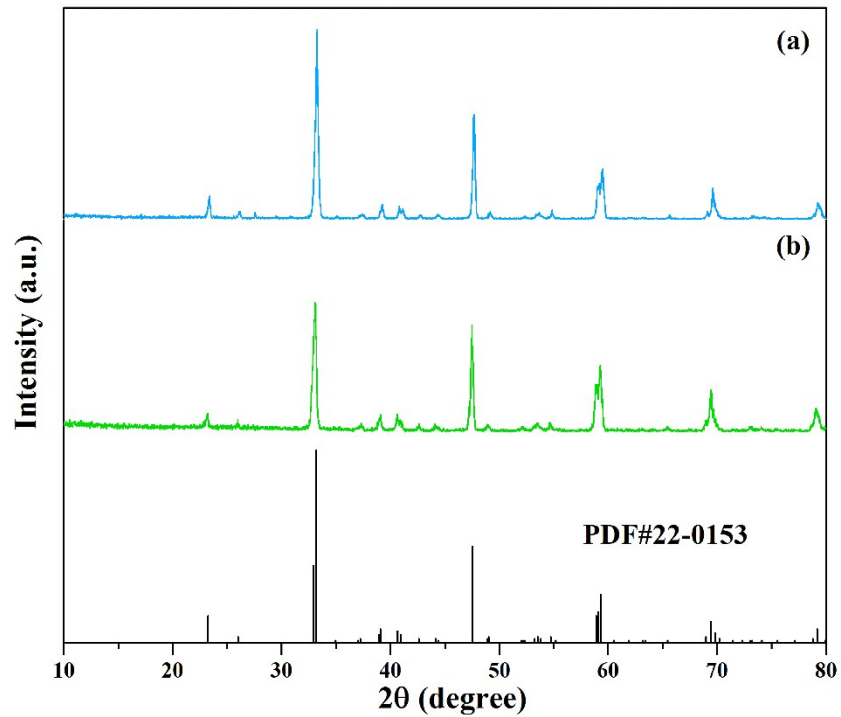

**Fig. S8.** (a) XRD pattern of the CTO:Pr<sup>3+</sup>,Er<sup>3+</sup> after being heated with 1000°C. (b) XRD pattern of the CTO:Pr<sup>3+</sup>,Er<sup>3+</sup> after being placed in tap water for 12 h

**Table S1** (a). The refinement data for CaTiO<sub>3</sub>.

| Crystal data         |                                            |
|----------------------|--------------------------------------------|
| Chemical formula     | CaTiO <sub>3</sub>                         |
| Formula weight       | 260.96 g/mol                               |
| Crystalsystem        | orthorhombic                               |
| Space group          | P n m a (62)                               |
| Unit cell dimensions | a=5.3782(2)Å,b=5.4389(3)Å<br>c=7.6380(1) Å |
| Volume               | 223.377(1) Å <sup>3</sup>                  |

|                                 |                          |
|---------------------------------|--------------------------|
| Z                               | 4                        |
| Density(calculated)             | 3.50354g/cm <sup>3</sup> |
| X-ray diffractometer            | Rigaku D/max-240         |
| Temperature                     | 298K                     |
| Theta range for data collection | 10° to 80°               |
| R <sub>wp</sub>                 | 14.0%                    |
| R <sub>p</sub>                  | 8.9%                     |
| $\chi^2$                        | 1.572                    |

**Table S1** (b). Atomic coordinates and isotropic displacement parameters for CaTiO<sub>3</sub>.

| Atom            | Wyckoff | x/a    | y/b   | z/c   | Fraction | U <sub>iso</sub> |
|-----------------|---------|--------|-------|-------|----------|------------------|
| Ca <sub>1</sub> | 4c      | -0.006 | 0.036 | 0.250 | 1        | 0.025            |
| Ti <sub>1</sub> | 4b      | 0      | 0.5   | 0     | 1        | 0.025            |
| O <sub>1</sub>  | 4c      | 0.071  | 0.483 | 0.250 | 1        | 0.025            |
| O <sub>2</sub>  | 8d      | 0.710  | 0.288 | 0.037 | 1        | 0.025            |

**Table S3**. TL parameters of CaTiO<sub>3</sub>:Pr<sup>3+</sup>, Er<sup>3+</sup>.

| Trap | T <sub>m</sub> (K) | E(eV) |
|------|--------------------|-------|
| 1    | 344                | 0.69  |
| 2    | 383                | 0.77  |

The trap depths can be calculated by the Urbach method<sup>[3]</sup>.

$$E = T_m/500$$

where T<sub>m</sub> is the peak temperature (in Kelvin).



## Notes and referencers

- [1]. Dai, P. P.; Li, C.; Zhang, X. T.; Xu, J.; Chen, X.; Wang, X. L.; Liu, Y. C. A single Eu<sup>2+</sup>-activated high-color-rendering oxychloride white-light phosphor for white-light-emitting diodes. *Light-Sci Appl*, **2016**, *5*, e16024-e16024.
- [2]. Wang, J.; Lin, H.; Huang, Q.; Xiao, G.; Xu, J.; Wang, B; Wang, Y. Structure and luminescence behavior of a single-ion activated single-phased Ba<sub>2</sub>Y<sub>3</sub>(SiO<sub>4</sub>)<sub>3</sub>F: Eu white-light phosphor. *J. Mater. Chem. C*, **2017**, *5*, 1789-1797.
- [3]. Hoerder, G. J.; Seibald, M.; Baumann, D.; Schröder, T.; Peschke, S.; Schmid, P. C.; Patzig, C. Sr[Li<sub>2</sub>Al<sub>2</sub>O<sub>2</sub>N<sub>2</sub>]:Eu<sup>2+</sup>—A high performance red phosphor to brighten the future. *Nat. Commun*, **2019**, *10*, 1-9.
